# Supplementary material for: Mechanism‐Based Modeling of Gastric Emptying Rate and Gallbladder Emptying in Response to Caloric Intake
Source: PubMed Central journal article supplement — CPT Pharmacometrics Syst Pharmacol. 2016 Dec 28;5(12):692–700. doi: 10.1002/psp4.12152 (PMC5192972; doi:10.1002/psp4.12152), 2016-12-28
Supplement: PSP4-5-692-s001.pdf [file PSP4-5-692-s001.pdf]

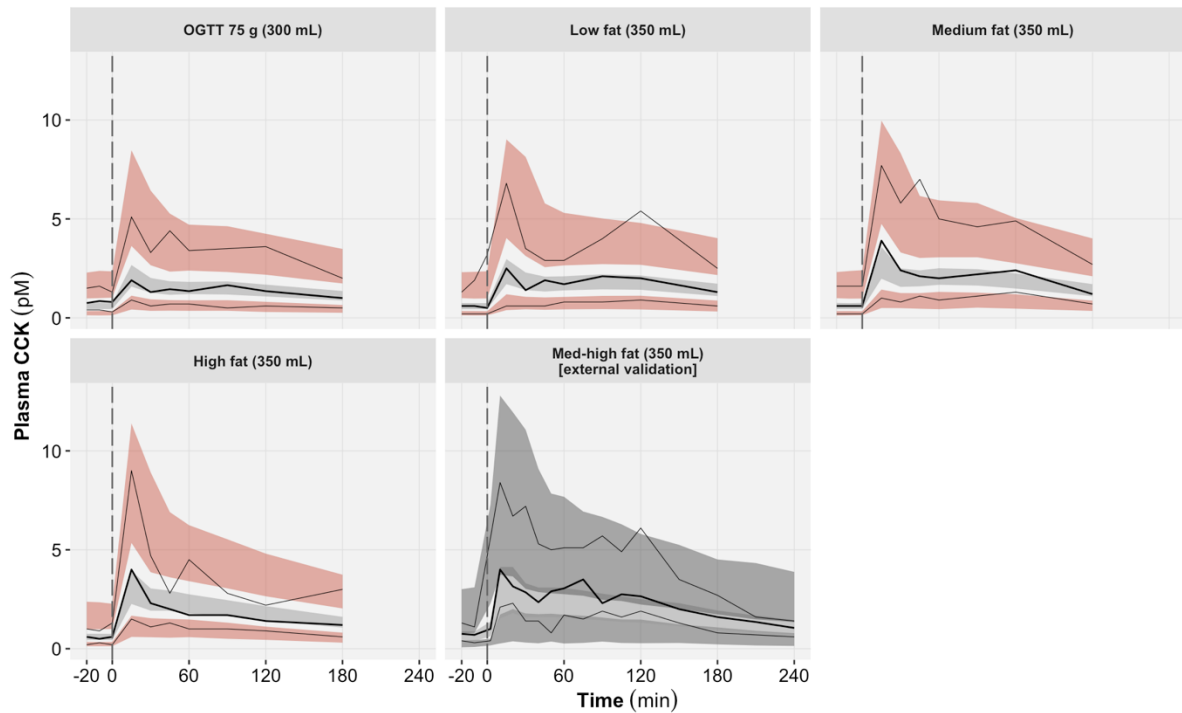

**Figure S3:** Visual predictive checks of the cholecystokin (CCK) plasma concentration time course and stratified by test drink. For each panel, the median (bold lines), 5<sup>th</sup> and 95<sup>th</sup> percentiles (thin lines) of the observed data are compared to the 95% confidence intervals (shaded areas) for the median (light grey), 5<sup>th</sup> and 95<sup>th</sup> percentiles of the simulated data (red/dark grey) (based on 1000 simulations). The external validation of CCK was performed by simulation only. The vertical lines (dashed grey) represent the time of the test drink administration. OGTT: oral glucose tolerance test
