# Supplementary material for: Mechanism‐Based Modeling of Gastric Emptying Rate and Gallbladder Emptying in Response to Caloric Intake
Source: PubMed Central journal article supplement — CPT Pharmacometrics Syst Pharmacol. 2016 Dec 28;5(12):692–700. doi: 10.1002/psp4.12152 (PMC5192972; doi:10.1002/psp4.12152), 2016-12-28
Supplement: PSP4-5-692-s004.pdf [file PSP4-5-692-s004.pdf]

**Table S2:** Parameter shrinkage for the selected models

| Gastric emptying model           |               | Cholecystokinin model            |               | Gallbladder emptying model       |               |
|----------------------------------|---------------|----------------------------------|---------------|----------------------------------|---------------|
| Parameter                        | Shrinkage (%) | Parameter                        | Shrinkage (%) | Parameter                        | Shrinkage (%) |
| <i>η</i> -shrinkage <sup>a</sup> |               | <i>η</i> -shrinkage <sup>a</sup> |               | <i>η</i> -shrinkage <sup>a</sup> |               |
| V <sub>C</sub> /F                | 26            | BASE <sub>CCKF</sub>             | 5.3           | BASE <sub>BILE</sub>             | 3.1           |
| F <sub>1</sub>                   | 6.7           | POOL <sub>CCKL</sub>             | 12            | K <sub>RB</sub>                  | 34            |
| K <sub>G0</sub>                  | 21            | K <sub>outF</sub>                | 13            | S <sub>50-BILE</sub>             | 16            |
| SLP <sub>CAL</sub> <sup>b</sup>  | 45            |                                  |               |                                  |               |
| K <sub>DJ</sub> <sup>b</sup>     | 23            |                                  |               |                                  |               |
| <i>ε</i> -shrinkage <sup>c</sup> |               | <i>ε</i> -shrinkage <sup>c</sup> |               | <i>ε</i> -shrinkage <sup>c</sup> |               |
|                                  | 17            |                                  | 13            |                                  | 17            |

BASE<sub>BILE</sub> baseline gallbladder volume; BASE<sub>CCKF</sub> baseline plasma concentrations of CCK<sub>F</sub>; F<sub>1</sub> relative acetaminophen bioavailability; K<sub>DJ</sub> nutrient transfer rate constant between duodenum and jejunum; K<sub>G0</sub> baseline gastric emptying rate constant; K<sub>outF</sub> the CCK<sub>F</sub> plasma disappearance rate constant; K<sub>RB</sub> gallbladder emptying rate constant; POOL<sub>CCKL</sub> pool size of CCK<sub>L</sub>; S<sub>50-BILE</sub> nutrients signal leading to 50% effect of S<sub>MAX-BILE</sub>; SLP<sub>CAL</sub> slope of the caloric feedback loop on gastric emptying; V<sub>C</sub>/F apparent acetaminophen central volume of distribution

<sup>a</sup> *η*-shrinkage calculated as 1-SD(*η*)/*ω* where *η* are the empirical Bayes estimates drawn from a normal distribution of mean 0 and standard deviation *ω*

<sup>b</sup> Subjects from Study A (water only) removed for shrinkage calculation

<sup>c</sup> *ε*-shrinkage calculated as 1-SD(IWRES) where IWRES are the individual weighted residuals
